# Supplementary material for: Loss of gut microbial diversity in the cultured, agastric fish, Mexican pike silverside ( Chirostoma estor : Atherinopsidae)
Source: PeerJ journal article supplement (doi:10.7717/peerj.13052), 2022-03-07
Supplement: FigureS1.pdf [file FigureS1.pdf]

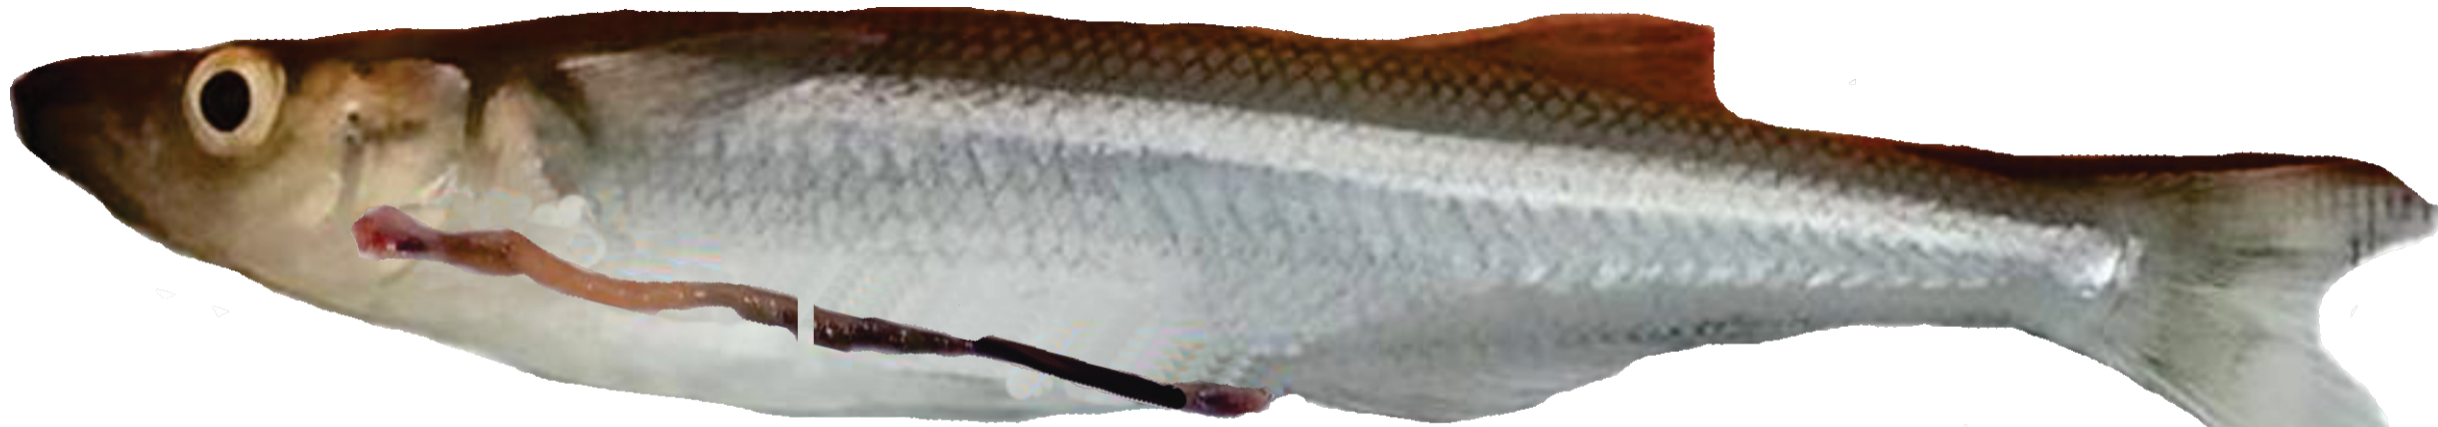

**Anterior gut** **Posterior gut**
