# Supplementary material for: Loss of gut microbial diversity in the cultured, agastric fish, Mexican pike silverside ( Chirostoma estor : Atherinopsidae)
Source: PeerJ journal article supplement (doi:10.7717/peerj.13052), 2022-03-07

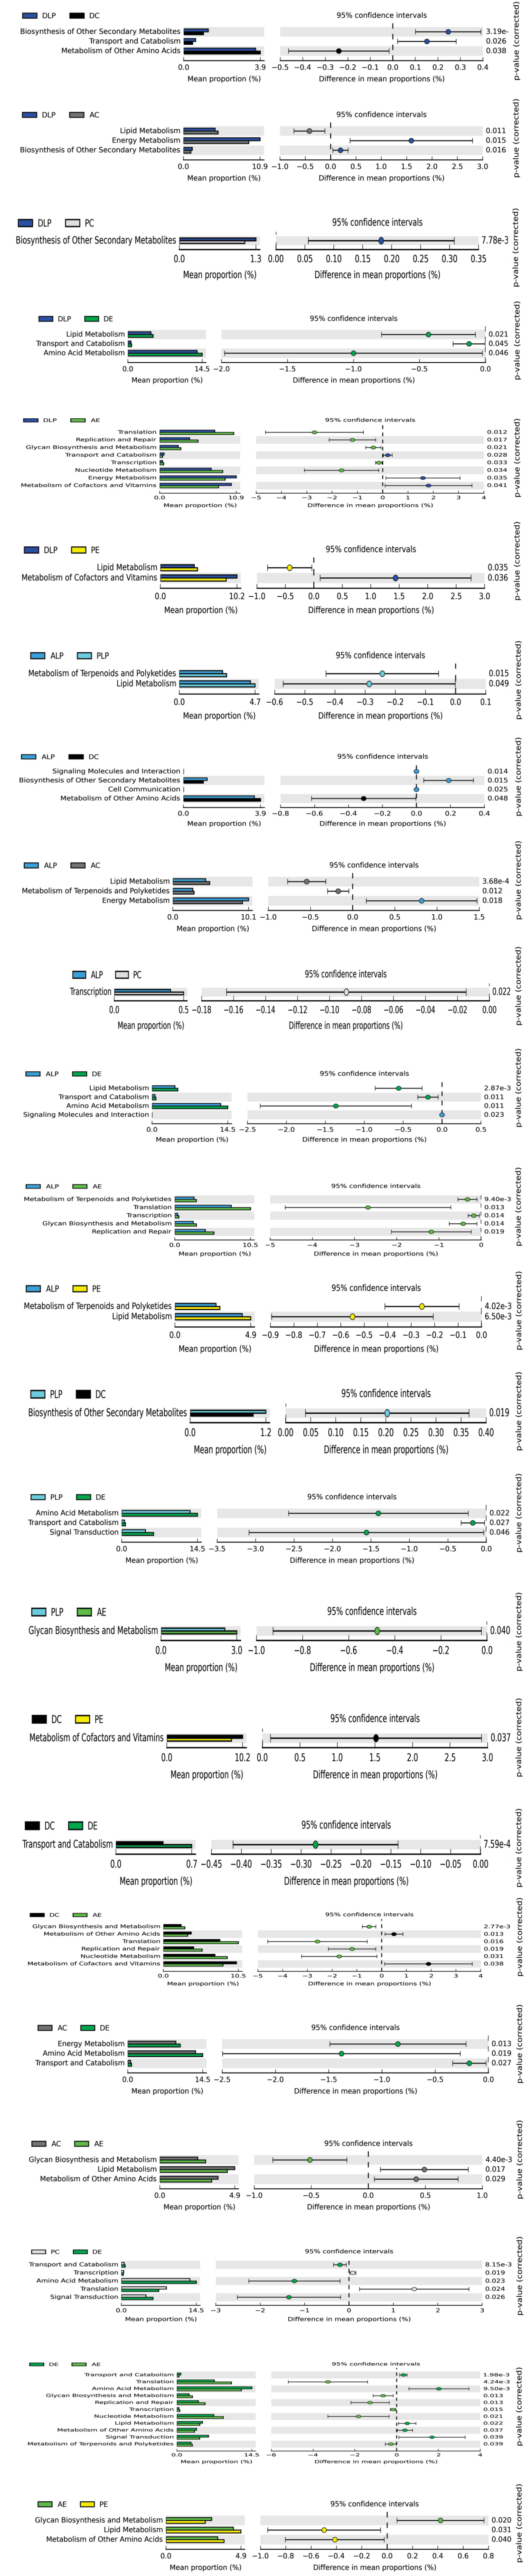

Supplement: FigureS4.pdf [file FigureS4.pdf]
